# Supplementary material
Source: Springer Nature journal article supplement (https://www.springermedizin.de/resource/supplementary/12885_2014_5043_MOESM5_ESM.pdf/9468098)
Supplement: MOESM5 [file 9468098]

**ORs and P-values for hemostatic parameters stratified by hormone receptor status (ER and PR) and triple negative status (ER negative/PR negative/HER2 negative)**

| Parameter                     | Estrogen receptor (ER) status       |                   |            |                                     |                     |            |                                            |                  |            |
|-------------------------------|-------------------------------------|-------------------|------------|-------------------------------------|---------------------|------------|--------------------------------------------|------------------|------------|
|                               | ER-negative cases (n)/ controls (n) | OR (95% CI)       | P (unadj.) | ER-positive cases (n)/ controls (n) | OR (95% CI)         | P (unadj.) | ER-negative cases(n)/ ER-positive cases(n) | OR (95% CI)      | P (unadj.) |
| <b>Coagulation activity:</b>  |                                     |                   |            |                                     |                     |            |                                            |                  |            |
| <i>CAT-assay parameters:</i>  |                                     |                   |            |                                     |                     |            |                                            |                  |            |
| Lagtime                       |                                     |                   |            |                                     |                     |            |                                            |                  |            |
| >10th percentile              | 31/246                              | Ref.              | Ref.       | 165/246                             | Ref.                | Ref.       | 31/165                                     | Ref.             | Ref.       |
| <10th percentile              | 24/27                               | 7.05 (3.63-13.71) | <0.001     | 96/27                               | 5.30 (3.31-8.48)    | <0.001     | 24/96                                      | 1.33 (0.74-2.40) | 0.342      |
| Peak                          |                                     |                   |            |                                     |                     |            |                                            |                  |            |
| <90th percentile              | 32/246                              | Ref.              | Ref.       | 156/246                             | Ref.                | Ref.       | 32/156                                     | Ref.             | Ref.       |
| >90thpercentile               | 23/27                               | 6.55 (3.36-12.76) | <0.001     | 105/27                              | 6.13 (3.84-9.79)    | <0.001     | 23/105                                     | 1.07 (0.59-1.93) | 0.827      |
| ttPeak                        |                                     |                   |            |                                     |                     |            |                                            |                  |            |
| >10th percentile              | 29/249                              | Ref.              | Ref.       | 159/249                             | Ref.                | Ref.       | 29/159                                     | Ref.             | Ref.       |
| <10th percentile              | 26/24                               | 9.30 (4.74-18.27) | <0.001     | 102/24                              | 6.66 (4.09-10.83)   | <0.001     | 26/102                                     | 1.40 (0.78-2.51) | 0.262      |
| APC resistance                |                                     |                   |            |                                     |                     |            |                                            |                  |            |
| <i>FVL non-carriers</i>       |                                     |                   |            |                                     |                     |            |                                            |                  |            |
| <90th percentile              | 29/228                              | Ref.              | Ref.       | 145/228                             | Ref.                | Ref.       | 29/145                                     | Ref.             | Ref.       |
| >90thpercentile               | 24/25                               | 7.55 (3.82-14.90) | <0.001     | 98/25                               | 6.16 (3.79-10.02)   | <0.001     | 24/98                                      | 1.22 (0.67-2.23) | 0.507      |
| <i>FVL carriers</i>           |                                     |                   |            |                                     |                     |            |                                            |                  |            |
| <90th percentile              | 0/18                                | Ref.              | Ref.       | 3/18                                | Ref.                | Ref.       | 0/3                                        | Ref.             | Ref.       |
| >90thpercentile               | 2/2                                 | NA                | NA         | 15/2                                | 45.00 (6.62-305.69) | <0.001     | 2/15                                       | NA               | NA         |
| D-dimer                       |                                     |                   |            |                                     |                     |            |                                            |                  |            |
| <90th percentile              | 48/246                              | Ref.              | Ref.       | 217/246                             | Ref.                | Ref.       | 48/217                                     | Ref.             | Ref.       |
| >90thpercentile               | 10/27                               | 1.90 (0.86-4.18)  | 0.111      | 49/27                               | 2.06 (1.24-3.41)    | 0.005      | 10/49                                      | 0.92 (0.44-1.95) | 0.833      |
| <b>Coagulation inhibitor:</b> |                                     |                   |            |                                     |                     |            |                                            |                  |            |
| AT                            |                                     |                   |            |                                     |                     |            |                                            |                  |            |
| >10th percentile              | 38/246                              | Ref.              | Ref.       | 155/246                             | Ref.                | Ref.       | 38/155                                     | Ref.             | Ref.       |
| <10th percentile              | 19/27                               | 4.56 (2.31-8.98)  | <0.001     | 107/27                              | 6.29 (3.94-10.04)   | <0.001     | 19/107                                     | 0.72 (0.40-1.32) | 0.295      |

| Parameter                     | Progesterone receptor (PR) status  |                   |            |                                     |                     |            |                                              |                  |            |
|-------------------------------|------------------------------------|-------------------|------------|-------------------------------------|---------------------|------------|----------------------------------------------|------------------|------------|
|                               | PR-negative cases(n)/ controls (n) | OR (95% CI)       | P (unadj.) | PR-positive cases (n)/ controls (n) | OR (95% CI)         | P (unadj.) | PR-negative cases (n)/ PR-positive cases (n) | OR (95% CI)      | P (unadj.) |
| <b>Coagulation activity:</b>  |                                    |                   |            |                                     |                     |            |                                              |                  |            |
| <i>CAT-assay parameters:</i>  |                                    |                   |            |                                     |                     |            |                                              |                  |            |
| Lagtime                       |                                    |                   |            |                                     |                     |            |                                              |                  |            |
| >10th percentile              | 56/246                             | Ref.              | Ref.       | 140/246                             | Ref.                | Ref.       | 56/140                                       | Ref.             | Ref.       |
| <10th percentile              | 37/27                              | 6.02 (3.39-10.70) | <0.001     | 83/27                               | 5.40 (3.34-8.74)    | <0.001     | 37/83                                        | 1.11 (0.68-1.83) | 0.669      |
| Peak                          |                                    |                   |            |                                     |                     |            |                                              |                  |            |
| <90th percentile              | 60/246                             | Ref.              | Ref.       | 128//246                            | Ref.                | Ref.       | 60/128                                       | Ref.             | Ref.       |
| >90thpercentile               | 33/27                              | 5.01 (2.80-8.96)  | <0.001     | 95/27                               | 6.76 (4.19-10.90)   | <0.001     | 33/95                                        | 0.74 (0.45-1.22) | 0.241      |
| ttPeak                        |                                    |                   |            |                                     |                     |            |                                              |                  |            |
| >10th percentile              | 54/249                             | Ref.              | Ref.       | 134/249                             | Ref.                | Ref.       | 54/134                                       | Ref.             | Ref.       |
| <10th percentile              | 39/24                              | 7.49 (4.16-13.48) | <0.001     | 89/24                               | 6.89 (4.19-11.33)   | <0.001     | 39/89                                        | 1.09 (0.67-1.78) | 0.738      |
| <b>APC resistance</b>         |                                    |                   |            |                                     |                     |            |                                              |                  |            |
| <i>FVL non-carriers</i>       |                                    |                   |            |                                     |                     |            |                                              |                  |            |
| <90th percentile              | 65/228                             | Ref.              | Ref.       | 164/228                             | Ref.                | Ref.       | 65/164                                       | Ref.             | Ref.       |
| >90thpercentile               | 23/25                              | 3.23 (1.72-6.06)  | <0.001     | 44/25                               | 2.45 (1.44-4.16)    | 0.001      | 23/44                                        | 1.32 (0.74-2.36) | 0.350      |
| <i>FVL carriers</i>           |                                    |                   |            |                                     |                     |            |                                              |                  |            |
| <90th percentile              | 0/18                               | Ref.              | Ref.       | 3/18                                | Ref.                | Ref.       | 0/3                                          | Ref.             | Ref.       |
| >90thpercentile               | 5/2                                | NA                | NA         | 12/2                                | 36.00 (5.21-248.66) | <0.001     | 5/12                                         | NA               | NA         |
| <b>D-dimer</b>                |                                    |                   |            |                                     |                     |            |                                              |                  |            |
| <90th percentile              | 79/246                             | Ref.              | Ref.       | 186/246                             | Ref.                | Ref.       | 79/186                                       | Ref.             | Ref.       |
| >90thpercentile               | 16/27                              | 1.85 (0.95-3.60)  | 0.072      | 43/27                               | 2.11 (1.26-3.53)    | 0.004      | 16/43                                        | 0.88 (0.47-1.65) | 0.681      |
| <b>Coagulation inhibitor:</b> |                                    |                   |            |                                     |                     |            |                                              |                  |            |
| <b>AT</b>                     |                                    |                   |            |                                     |                     |            |                                              |                  |            |
| >10th percentile              | 61/246                             | Ref.              | Ref.       | 132/246                             | Ref.                | Ref.       | 61/132                                       | Ref.             | Ref.       |
| <10th percentile              | 32/27                              | 4.78 (2.67-8.57)  | <0.001     | 94/27                               | 6.49 (4.03-10.46)   | <0.001     | 32/94                                        | 0.74 (0.45-1.22) | 0.234      |

| <b>Hormone receptor negative status<br/>(ER negative/PR negative)</b> |                                                       |                    |                       |
|-----------------------------------------------------------------------|-------------------------------------------------------|--------------------|-----------------------|
| <b>Parameter</b>                                                      | <b>ER/PR negative cases (n)/<br/>other cases* (n)</b> | <b>OR (95% CI)</b> | <b>P<br/>(unadj.)</b> |
| <b>Coagulation activity:</b>                                          |                                                       |                    |                       |
| <i>CAT-assay parameters:</i>                                          |                                                       |                    |                       |
| Lagtime                                                               |                                                       |                    |                       |
| >10th percentile                                                      | 31/165                                                | Ref.               | Ref.                  |
| <10th percentile                                                      | 22/98                                                 | 1.19 (0.66-2.18)   | 0.561                 |
| Peak                                                                  |                                                       |                    |                       |
| <90th percentile                                                      | 31/157                                                | Ref.               | Ref.                  |
| >90thpercentile                                                       | 22/106                                                | 1.05 (0.58-1.91)   | 0.870                 |
| ttPeak                                                                |                                                       |                    |                       |
| >10th percentile                                                      | 29/159                                                | Ref.               | Ref.                  |
| <10th percentile                                                      | 24/104                                                | 1.27 (0.70-2.29)   | 0.438                 |
| <b>APC resistance</b>                                                 |                                                       |                    |                       |
| <i>FVL non-carriers</i>                                               |                                                       |                    |                       |
| <90th percentile                                                      | 29/145                                                | Ref.               | Ref.                  |
| >90thpercentile                                                       | 22/100                                                | 1.10 (0.60-2.02)   | 0.759                 |
| <i>FVL carriers</i>                                                   |                                                       |                    |                       |
| <90th percentile                                                      | 0/3                                                   | Ref.               | Ref.                  |
| >90thpercentile                                                       | 2/15                                                  | NA                 | NA                    |
| <b>D-dimer</b>                                                        |                                                       |                    |                       |
| <90th percentile                                                      | 46/219                                                | Ref.               | Ref.                  |
| >90thpercentile                                                       | 10/49                                                 | 0.97 (0.46-2.06)   | 0.940                 |
| <b>Coagulation inhibitor:</b>                                         |                                                       |                    |                       |
| <b>AT</b>                                                             |                                                       |                    |                       |
| >10th percentile                                                      | 36/157                                                | Ref.               | Ref.                  |
| <10th percentile                                                      | 19/107                                                | 0.77 (0.42-1.42)   | 0.410                 |

\*Cases with either ER negative/PR positive, ER positive/PR negative or ER positive/PR positive status

| Parameter                     | Triple negative status (ER/PR/HER2 negative)   |                  |               |
|-------------------------------|------------------------------------------------|------------------|---------------|
|                               | Triple negative cases (n)/<br>other cases* (n) | OR (95% CI)      | P<br>(unadj.) |
| <b>Coagulation activity:</b>  |                                                |                  |               |
| <i>CAT-assay parameters:</i>  |                                                |                  |               |
| Lagtime                       |                                                |                  |               |
| >10th percentile              | 25/171                                         | Ref.             | Ref.          |
| <10th percentile              | 20/100                                         | 1.37 (0.72-2.59) | 0.335         |
| Peak                          |                                                |                  |               |
| <90th percentile              | 26/162                                         | Ref.             | Ref.          |
| >90thpercentile               | 19/109                                         | 1.09 (0.57-2.06) | 0.800         |
| ttPeak                        |                                                |                  |               |
| >10th percentile              | 24/164                                         | Ref.             | Ref.          |
| <10th percentile              | 21/107                                         | 1.34(0.71-2.53)  | 0.364         |
| <b>APC resistance</b>         |                                                |                  |               |
| <i>FVL non-carriers</i>       |                                                |                  |               |
| <90th percentile              | 23/151                                         | Ref.             | Ref.          |
| >90thpercentile               | 20/102                                         | 1.29 (0.67-2.47) | 0.446         |
| <i>FVL carriers</i>           |                                                |                  |               |
| <90th percentile              | 0/3                                            | Ref.             | Ref.          |
| >90thpercentile               | 2/15                                           | NA               | NA            |
| <b>D-dimer</b>                |                                                |                  |               |
| <90th percentile              | 40/225                                         | Ref.             | Ref.          |
| >90thpercentile               | 8/51                                           | 0.88 (0.39-2.00) | 0.764         |
| <b>Coagulation inhibitor:</b> |                                                |                  |               |
| AT                            |                                                |                  |               |
| >10th percentile              | 32/161                                         | Ref.             | Ref.          |
| <10th percentile              | 15/111                                         | 0.68 (0.35-1.31) | 0.251         |

\*Cases with either ER negative/PR positive/HER2 positive, ER negative/PR positive/HER2 negative, ER positive/PR negative/HER2 positive, ER positive/PR negative/HER2 negative, ER positive/PR positive/Her2 positive, ER positive/PR positive/Her2 negative, ER negative/PR negative/HER2 positive status.
